# Supplementary material for: An on–off–on chemiluminescence resonance energy transfer sensing platform based on Au/Pt@Cu2O/CuO nanozyme for the determination of ascorbic acid
Source: Royal Society of Chemistry journal article supplement (doi:10.1039/d4nj03073g), 2024-01-01
Supplement: d4nj03073g1.pdf [file d4nj03073g1.pdf]

## Supplementary Information

### **An on-off-on chemiluminescence resonance energy transfer sensing platform based on Au/Pt@Cu<sub>2</sub>O/CuO nanozyme for the determination of ascorbic acid**

Xiaoxu Zhang<sup>a</sup>, Xiangyu Cai<sup>a</sup>, Yanqun Fei<sup>b</sup>, Yuying Jia<sup>a</sup>, Hongyan Shan<sup>a</sup>, and Yanfu

Huan<sup>\*a</sup>

<sup>a</sup> College of Chemistry, Jilin University, Changchun 130023, People's Republic of China

<sup>b</sup> Changchun Zhuoyi Biological Co., Ltd., Changchun 130616, People's Republic of  
China

Corresponding author: Email: [yfhuan@jlu.edu.cn](mailto:yfhuan@jlu.edu.cn)

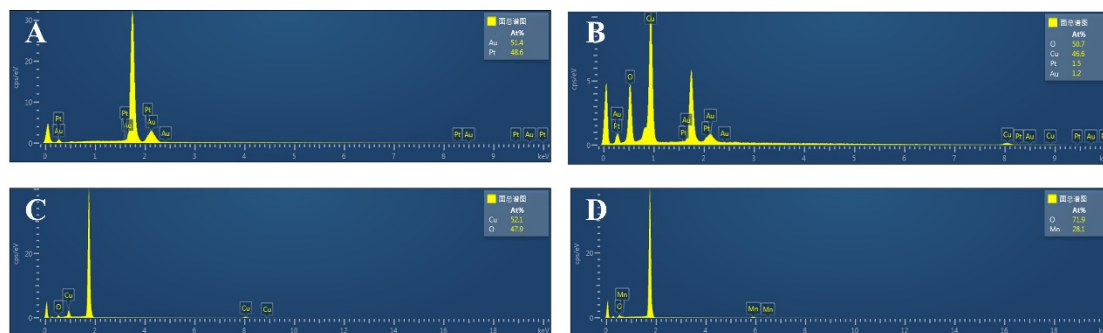

**Fig. S1** EDX energy spectra of **(A)** Au@Pt NPs; **(B)** Au/Pt@Cu<sub>2</sub>O/CuO NPs; **(C)** Cu<sub>2</sub>O@CuO NPs and **(D)** MnO<sub>2</sub> NSs

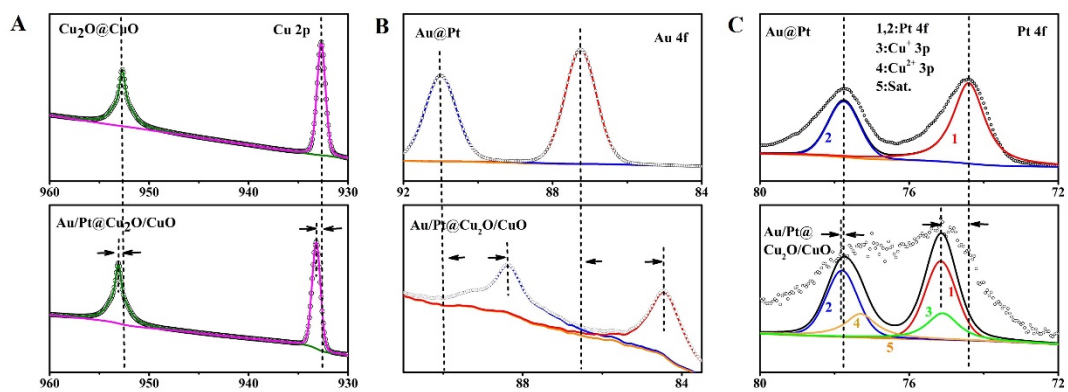

**Fig. S2** XPS spectra of **(A)** Cu 2p, **(B)** Au 4f and **(C)** Pt 4f in Au/Pt,  $\text{Cu}_2\text{O}/\text{CuO}$ , and Au/Pt@ $\text{Cu}_2\text{O}/\text{CuO}$

**Table S1** The influence of different radical scavengers on the Luminol-H<sub>2</sub>O<sub>2</sub>-  
Au/Pt@Cu<sub>2</sub>O/CuO NPs system

| <b>Quenchers</b> | <b>Intermediate</b>              | <b>Concentration</b> | <b>Percent inhibition, %</b> |
|------------------|----------------------------------|----------------------|------------------------------|
| Ascorbic acid    | ·OH, O <sub>2</sub> <sup>-</sup> | 2 mM                 | 98.65                        |
| TEMPO            | ·OH, <sup>1</sup> O <sub>2</sub> | 2 mM                 | 99.59                        |
| Methanol         | ·OH                              | 2 mM                 | 95.88                        |
| Histidine        | <sup>1</sup> O <sub>2</sub>      | 2 mM                 | 27.84                        |
| SOD              | O <sub>2</sub> <sup>-</sup>      | 0.2 μg/mg            | 98.07                        |

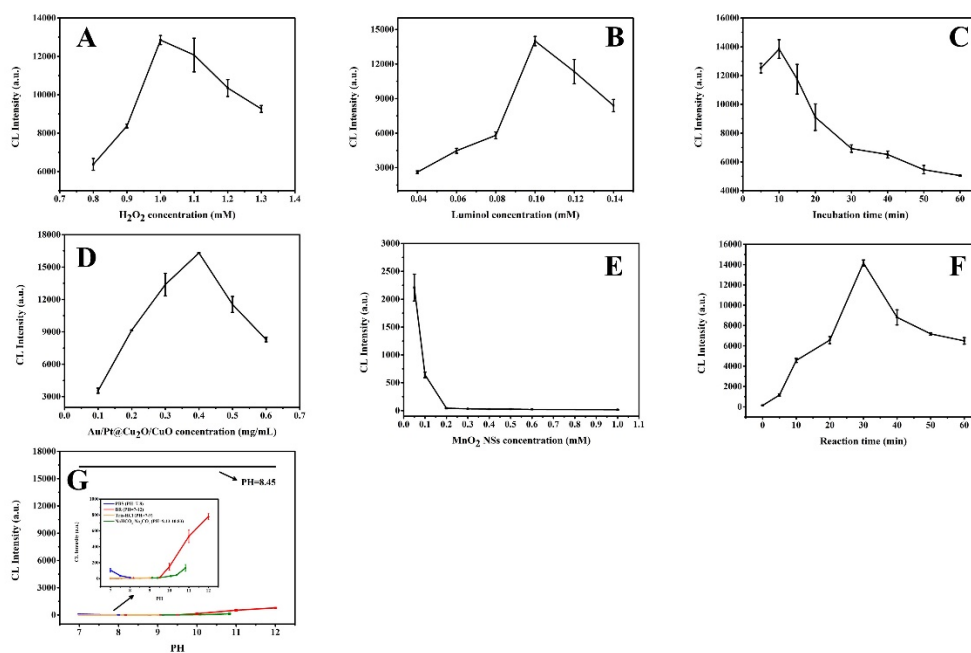

**Fig. S3** Optimization of  $\text{H}_2\text{O}_2$  concentration (**A**), Luminol concentration (**B**), incubation time of  $\text{H}_2\text{O}_2$  and Au/Pt@ $\text{Cu}_2\text{O}/\text{CuO}$  NPs (**C**), Au/Pt@ $\text{Cu}_2\text{O}/\text{CuO}$  NPs concentration (**D**),  $\text{MnO}_2$  NSs concentration (**E**), reaction time of  $\text{MnO}_2$  NSs and ascorbic acid (**F**), and effect of buffer solutions on the CL system (PBS, BR, Tris-HCl, and  $\text{Na}_2\text{CO}_3\text{-NaHCO}_3$ ) (**G**)

## References

- [1] X. Zhang, H. Zhi, M. Zhu, F. Wang, H. Meng, L. Feng, Electrochemical/visual dual-readout aptasensor for Ochratoxin A detection integrated into a miniaturized paper-based analytical device, *Biosens Bioelectron*, 180 (2021) 113146. <https://doi.org/10.1016/j.bios.2021.113146>.
- [2] A. Qileng, S. Chen, H. Liang, M. Chen, H. Lei, W. Liu, Y. Liu, Boosting ultralong chemiluminescence for the self-powered time-resolved immunosensor, *Biosens Bioelectron*, 234 (2023) 115338. <https://doi.org/10.1016/j.bios.2023.115338>.
- [3] Z.Z. Dong, L. Lu, C.N. Ko, C. Yang, S. Li, M.Y. Lee, C.H. Leung, D.L. Ma, A  $\text{MnO}(2)$  nanosheet-assisted GSH detection platform using an iridium(III) complex as a switch-on luminescent probe, *Nanoscale*, 9 (2017) 4677-4682. <https://doi.org/10.1039/c6nr08357a>.
